# Supplementary material for: Effect of Intermittent Fasting on Cardiometabolic Health in the Chinese Population: A Meta-Analysis of Randomized Controlled Trials
Source: MDPI journal article supplement (doi:10.3390/nu16030357), 2024-01-25
Supplement: s1 [file s1]

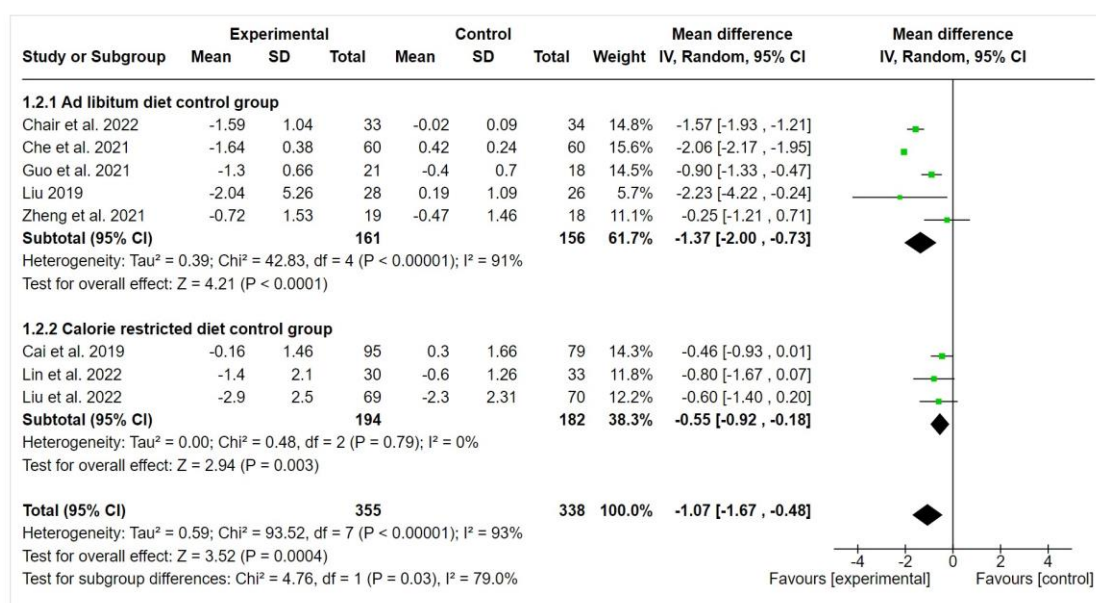

**Figure S1.** Forest plot for differences in body mass index (in  $\text{kg/m}^2$ ) between intermittent fasting and control groups [12,17–24].

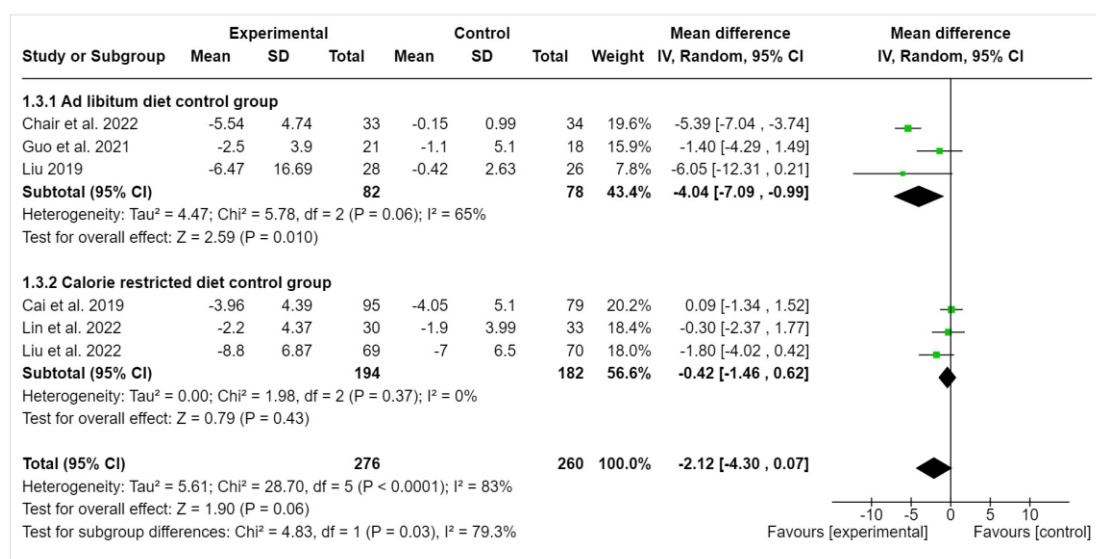

**Figure S2.** Forest plot for differences in waist circumference (in cm) between intermittent fasting and control groups [12,17,18,20–22].

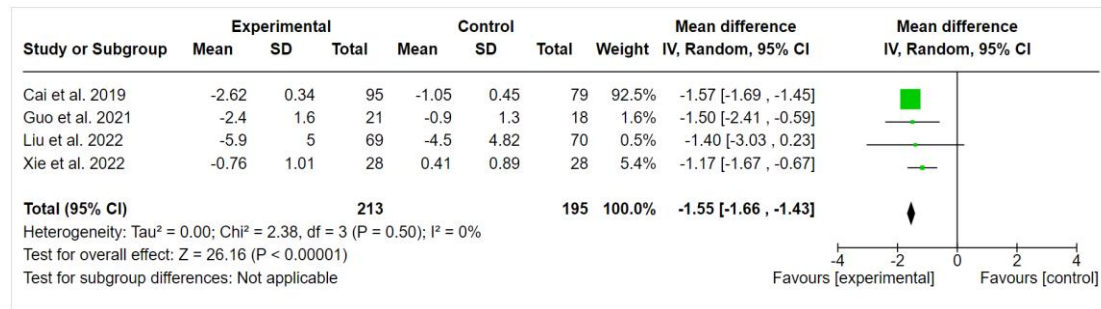

**Figure S3.** Forest plot for differences in body fat mass (in kg) between intermittent fasting and control groups [12,17,20,23].

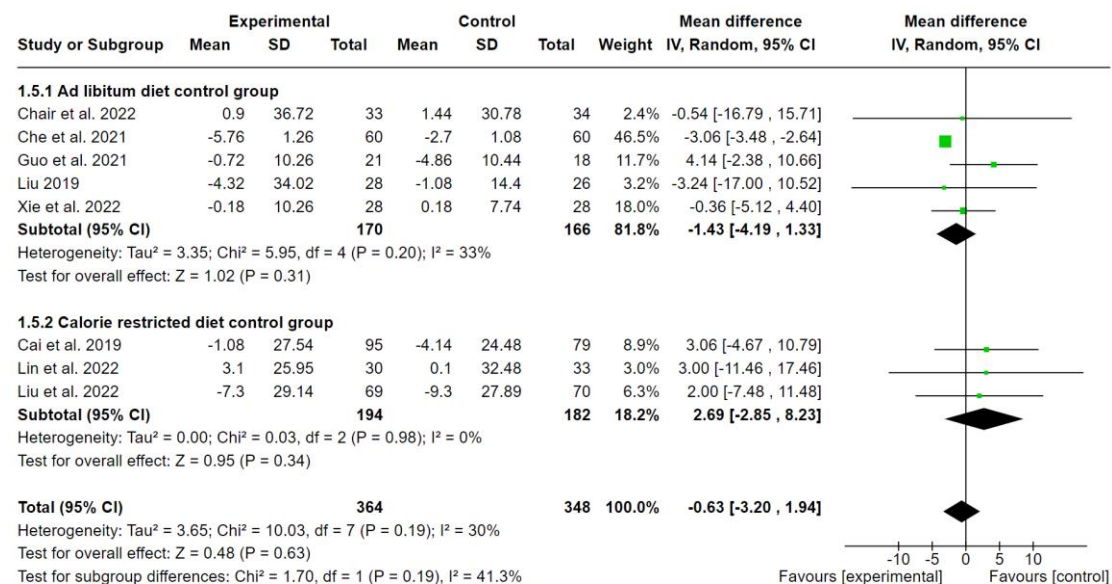

**Figure S4.** Forest plot for differences in total cholesterol (in mg/dL) between intermittent fasting and control groups [12,17–23].

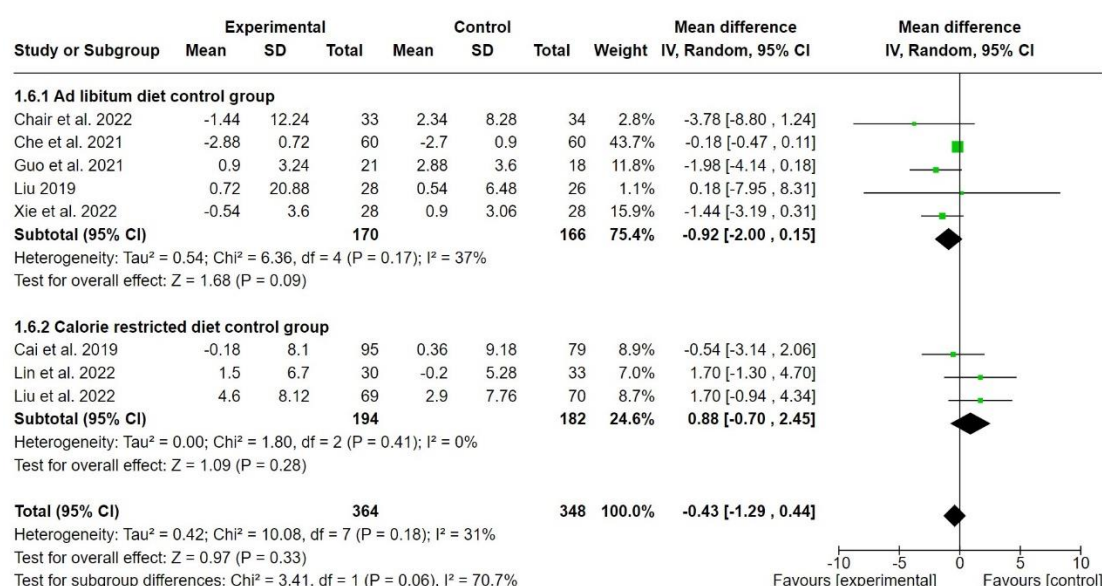

**Figure S5.** Forest plot for differences in high density lipoprotein cholesterol (in mg/dL) between intermittent fasting and control groups [12,17–23].

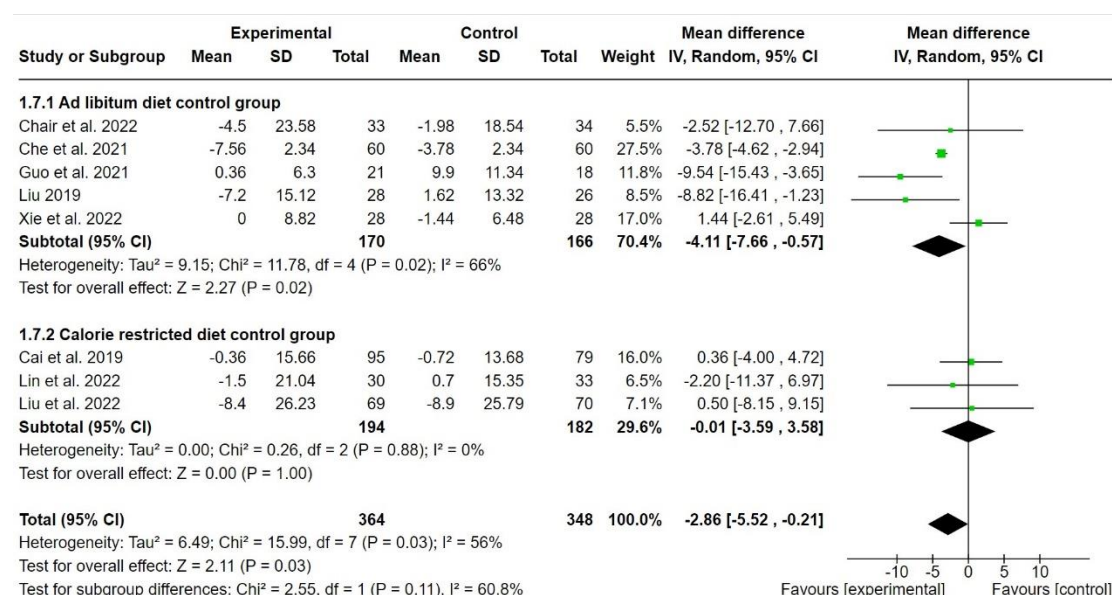

**Figure S6.** Forest plot for differences in low density lipoprotein cholesterol (in mg/dL) between intermittent fasting and control groups [12,17–23].

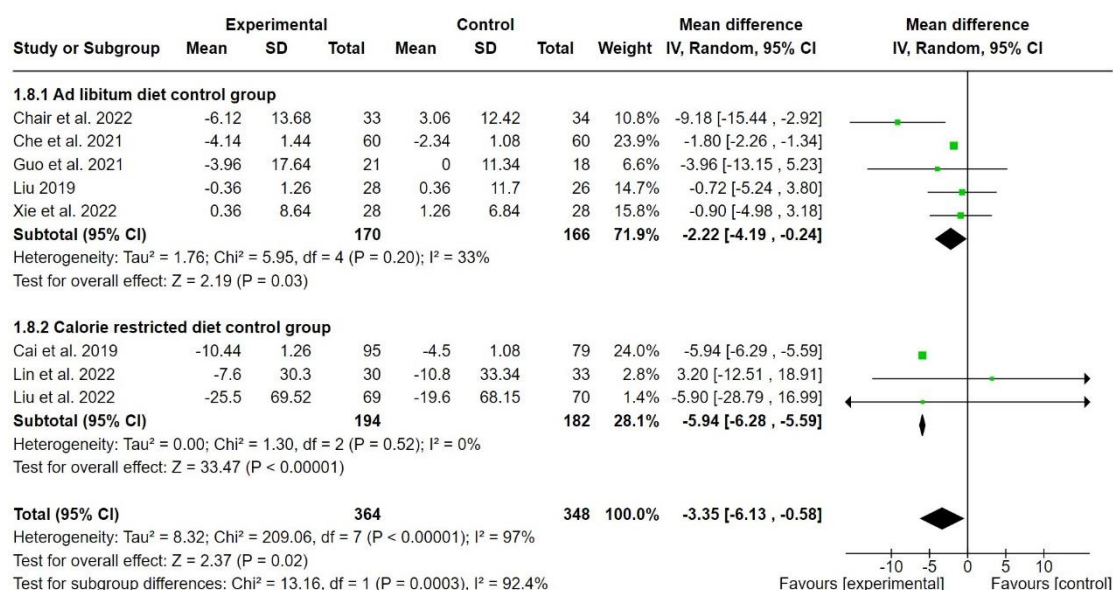

**Figure S7.** Forest plot for differences in triglycerides (in mg/dL) between intermittent fasting and control groups [12,17–23].

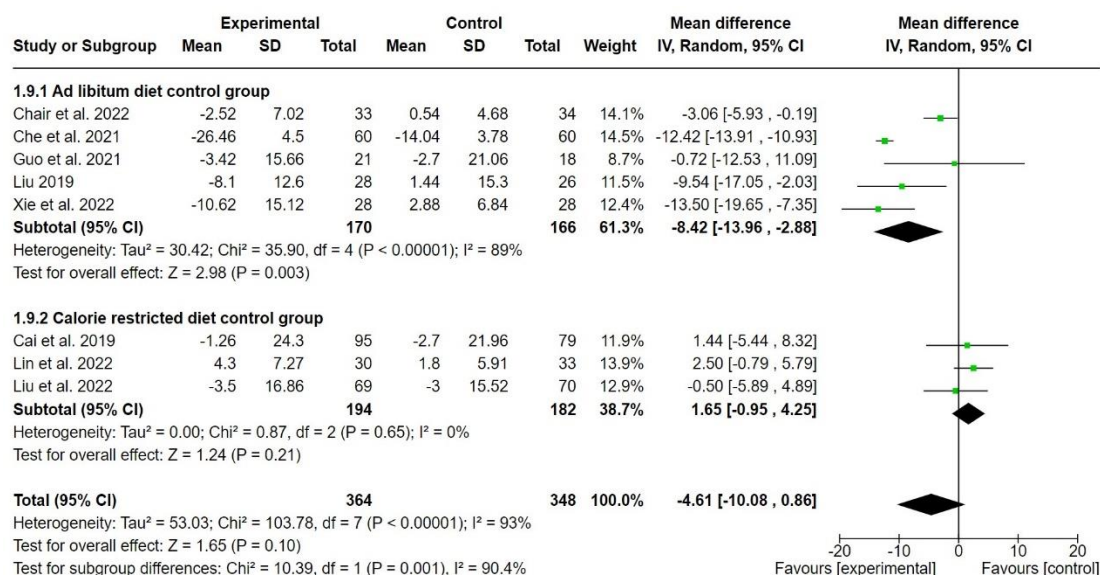

**Figure S8.** Forest plot for differences in fasting glucose or fasting plasma glucose (in mg/dL) between intermittent fasting and control groups [12,17–24].



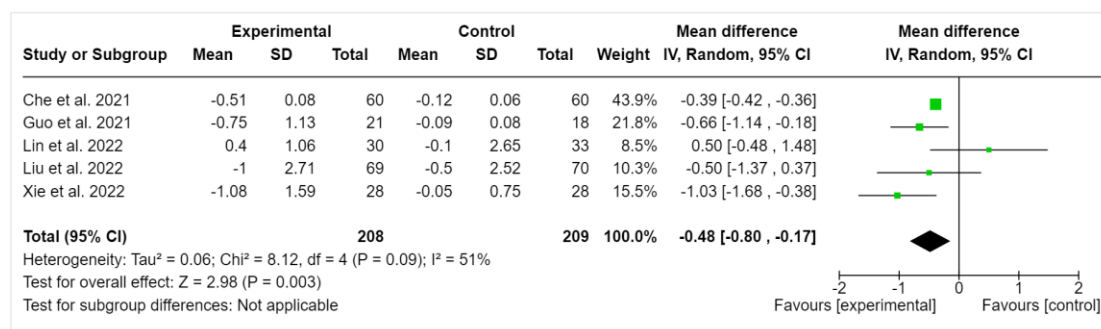

**Figure S9.** Forest plot for differences in homeostatic model assessment of insulin resistance between intermittent fasting and control groups [12,19–21,23].

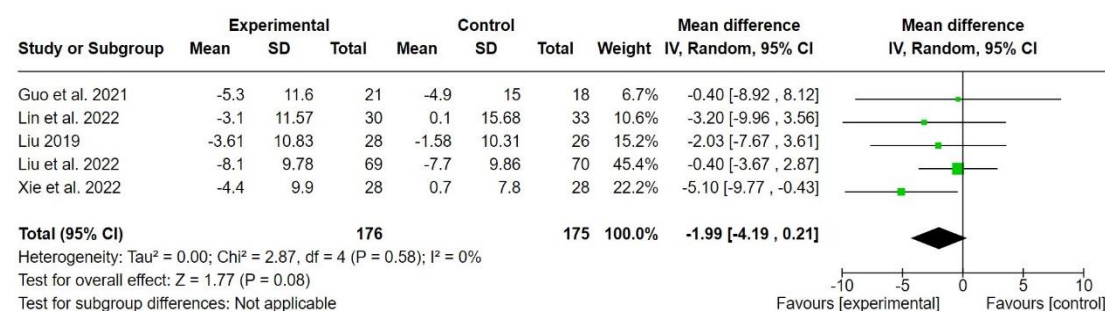

**Figure S10.** Forest plot for differences in systolic blood pressure (in mmHg) between intermittent fasting and control groups [12,20–23].

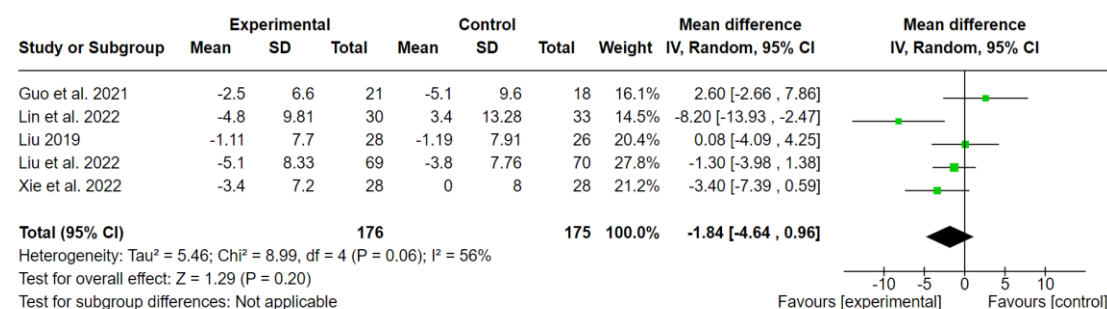

**Figure S11.** Forest plot for differences in diastolic blood pressure (in mmHg) between intermittent fasting and control groups [12,20–23].

**Table S1.** Search terms used in the literature review.

| <b>Databases</b>                                                            | <b>Search terms used</b>                                                                                                                                                                     |
|-----------------------------------------------------------------------------|----------------------------------------------------------------------------------------------------------------------------------------------------------------------------------------------|
| Ovid platform:<br>1. Ovid MEDLINE<br>2. Embase (via Ovid)<br>3. Ovid Emcare | (intermittent fasting or time restricted feeding or periodic fasting) AND (randomized controlled trial or clinical trial or controlled clinical trial or randomization or random assignment) |
| China National Knowledge Infrastructure (CNKI)                              | (間歇性斷食)                                                                                                                                                                                      |
| WanFang                                                                     | (intermittent fasting trial)                                                                                                                                                                 |

**Table S2.** Reported adverse events of the included studies.

| <b>Author, year</b>     | <b>Reported adverse events (AEs)</b>                                                                 | <b>Example of AEs (intervention group % vs control group %) (if applicable)</b>                                                                                                                                                                                  |
|-------------------------|------------------------------------------------------------------------------------------------------|------------------------------------------------------------------------------------------------------------------------------------------------------------------------------------------------------------------------------------------------------------------|
| Cai et al., 2019 [17]   | No severe AEs                                                                                        | --                                                                                                                                                                                                                                                               |
| Chair et al., 2022 [18] | No severe AEs                                                                                        | --                                                                                                                                                                                                                                                               |
| Che et al., 2021 [19]   | No severe AEs                                                                                        | --                                                                                                                                                                                                                                                               |
| Guo et al., 2021 [20]   | No severe AEs                                                                                        | --                                                                                                                                                                                                                                                               |
| Lin et al., 2022 [21]   | Did not mention                                                                                      | --                                                                                                                                                                                                                                                               |
| Liu 2019 [22]           | Occurrence of mild AEs uncommon in both intervention and control groups<br>Overall (7.33% vs. 3.85%) | Decreased concentration (2.86% vs. 0.38%)<br>Thirsty (1.79% vs. 0.77%)<br>Dizziness (1.07% vs. 0.38%)<br>Low blood sugar level (0.54% vs. 0.19%)<br>Abdominal bloating (0.18% vs. 1.15%)<br>Constipation (0.36% vs. 0.58%)<br>Unstable emotion (0.54% vs. 0.38%) |
| Liu et al., 2022 [12]   | Occurrence of mild AEs were similar in both intervention and control groups                          | Fatigue, dizziness, headache, decrease appetite, upper abdominal pain, dyspepsia and constipation                                                                                                                                                                |
| Xie et al., 2022 [23]   | No severe AEs                                                                                        | --                                                                                                                                                                                                                                                               |
| Zheng et al., 2021 [24] | Some AEs in both intervention and control groups                                                     | Hypoglycaemia (5.3% vs. 0%)<br>Hunger (5.3% vs. 0%)<br>Infection (5.3% vs. 5.5%)<br>Irritability (10.5% vs. 11.1%)<br>Nausea (5.3% vs. 0%)                                                                                                                       |

**Table S3.** Sensitivity analysis summary of the included studies in body weight and BMI.

| Study excluded             |                         | Body weight        |                     |                          | BMI                |                     |                          |
|----------------------------|-------------------------|--------------------|---------------------|--------------------------|--------------------|---------------------|--------------------------|
|                            |                         | I <sup>2</sup> (%) | P for heterogeneity | Mean Difference [95% CI] | I <sup>2</sup> (%) | P for heterogeneity | Mean Difference [95% CI] |
| Cai et al., 2019<br>[17]   | Overall                 | 68                 | 0.002               | -2.44 [-3.10, -1.77]     | 90                 | <0.001              | -1.18 [-1.76, -0.60]     |
|                            | ad libitum diet         | --                 | --                  | --                       | --                 | --                  | --                       |
|                            | calorie-restricted diet | 0                  | 0.71                | -1.41 [-2.97, 0.16]      | 0                  | 0.74                | -0.69 [-1.28, -0.10]     |
| Chair et al., 2022<br>[18] | Overall                 | 83                 | <0.001              | -1.88 [-2.37, -1.39]     | 93                 | <0.001              | -0.99 [-1.75, -0.23]     |
|                            | ad libitum diet         | 0                  | 0.64                | -2.15 [-2.28, -2.01]     | 92                 | <0.001              | -1.29 [-2.25, -0.34]     |
|                            | calorie-restricted diet | --                 | --                  | --                       | --                 | --                  | --                       |
| Che et al., 2021<br>[19]   | Overall                 | 82                 | <0.001              | -2.28 [-3.16, -1.41]     | 70                 | 0.003               | -0.88 [-1.33, -0.44]     |
|                            | ad libitum diet         | 78                 | 0.001               | -2.87 [-4.15, -1.59]     | 72                 | 0.01                | -1.11 [-1.74, -0.49]     |
|                            | calorie-restricted diet | --                 | --                  | --                       | --                 | --                  | --                       |
| Guo et al., 2021<br>[20]   | Overall                 | 89                 | <0.001              | -2.19 [-2.79, -1.60]     | 92                 | <0.001              | -1.10 [-1.75, -0.45]     |
|                            | ad libitum diet         | 81                 | <0.001              | -2.73 [-3.71, -1.76]     | 85                 | <0.001              | -1.55 [-2.16, -0.93]     |
|                            | calorie-restricted diet | --                 | --                  | --                       | --                 | --                  | --                       |
| Lin et al., 2022<br>[21]   | Overall                 | 89                 | <0.001              | -2.26 [-2.82, -1.70]     | 93                 | <0.001              | -1.11 [-1.75, -0.47]     |
|                            | ad libitum diet         | --                 | --                  | --                       | --                 | --                  | --                       |
|                            | calorie-restricted diet | 0                  | 0.79                | -1.40 [-1.60, -1.21]     | 0                  | 0.77                | -0.50 [-0.90, -0.09]     |
| Liu, 2019 [22]             | Overall                 | 89                 | <0.001              | -2.17 [-2.71, -1.62]     | 94                 | <0.001              | -1.00 [-1.62, -0.38]     |
|                            | ad libitum diet         | 79                 | <0.001              | -2.55 [-3.30, -1.79]     | 93                 | <0.001              | -1.30 [-1.97, -0.62]     |
|                            | calorie-restricted diet | --                 | --                  | --                       | --                 | --                  | --                       |
| Liu et al., 2022<br>[12]   | Overall                 | 89                 | <0.001              | -2.23 [-2.80, -1.67]     | 93                 | <0.001              | -1.14 [-1.77, -0.51]     |
|                            | ad libitum diet         | --                 | --                  | --                       | --                 | --                  | --                       |
|                            | calorie-restricted diet | 0                  | 0.79                | -1.40 [-1.59, -1.20]     | 0                  | 0.5                 | -0.54 [-0.95, -0.12]     |
| Xie et al., 2022<br>[23]   | Overall                 | 89                 | <0.001              | -2.27 [-2.89, -1.66]     | --                 | --                  | --                       |
|                            | ad libitum diet         | 80                 | <0.001              | -2.90 [-4.03, -1.77]     | --                 | --                  | --                       |
|                            | calorie-restricted diet | --                 | --                  | --                       | --                 | --                  | --                       |
| Zheng et al., 2021<br>[24] | Overall                 | 89                 | <0.001              | -2.22 [-2.78, -1.66]     | 93                 | <0.001              | -1.18 [-1.79, -0.56]     |
|                            | ad libitum diet         | 81                 | <0.001              | -2.67 [-3.48, -1.86]     | 90                 | <0.001              | -1.59 [-2.21, -0.96]     |
|                            | calorie-restricted diet | --                 | --                  | --                       | --                 | --                  | --                       |



**Table S4.** Pooled MDs when another intervention group in multi-arm studies was included.

| <b>Outcomes</b>    | <b>MDs when ADF group in multi-arm studies was included</b> | <b>MDs when mTRE group in multi-arm studies was included</b> |
|--------------------|-------------------------------------------------------------|--------------------------------------------------------------|
| <b>Body weight</b> | -2.16 [-2.27, -2.05], $I^2 = 0\%$                           | -2.03 [-2.62, -1.44], $I^2 = 89\%$                           |
| BMI                | -0.84 [-1.61, -0.08], $I^2 = 94\%$                          | --                                                           |
| WC                 | -0.95 [-1.97, 0.08], $I^2 = 7\%$                            | --                                                           |
| <b>BFM</b>         | -1.69 [-2.56, -0.82], $I^2 = 89\%$                          | -1.30 [-1.81, -0.78], $I^2 = 63\%$                           |
| TC                 | 0.19 [-2.72, 3.11], $I^2 = 49\%$                            | 0.31 [-2.76, 3.38], $I^2 = 49\%$                             |
| HDL                | -0.52 [-1.55, 0.51], $I^2 = 47\%$                           | -0.35 [-1.14, 0.43], $I^2 = 24\%$                            |
| LDL                | -2.59 [-5.29, 0.12], $I^2 = 60\%$                           | -2.83 [-5.53, -0.13], $I^2 = 58\%$                           |
| TG                 | 0.25 [-9.01, 9.50], $I^2 = 100\%$                           | -3.02 [-5.79, -0.25], $I^2 = 97\%$                           |
| FPG                | -4.13 [-9.68, 1.41], $I^2 = 100\%$                          | -4.38 [-9.93, 1.17], $I^2 = 93\%$                            |
| HOMA-IR            | --                                                          | -0.16 [-0.60, 0.28], $I^2 = 82\%$                            |
| SBP                | --                                                          | -2.22 [-4.46, 0.02], $I^2 = 2\%$                             |
| DBP                | --                                                          | -2.16 [-5.16, 0.84], $I^2 = 62\%$                            |

Abbreviations: ADF, alternate-day fasting; BMI, body mass index; BFM, body fat mass; DBP, diastolic blood pressure; FPG, fasting plasma glucose; HDL, high-density lipoprotein; HOMA-IR, homeostatic model assessment of insulin resistance; LDL, low-density lipoprotein; MDs, mean differences; mTRE, mid-day time restricted eating; TC, total cholesterol; TG, triglycerides; SBP, systolic blood pressure; WC, waist circumference.
